# Supplementary material
Source: publisher figshare collection journal article supplement (https://karger.figshare.com/ndownloader/files/20270283)
Supplement: Supplementary file 1 [file 20270283]

### Supplementary Table 1: Cause–specific mortality risk in the multiple sclerosis cohort in comparison to the general population by disease course

| **Cause of death** | **Relapsing onset MS** | | **Primary progressive MS** | |
| --- | --- | --- | --- | --- |
| **SMR (95% CI)**  **Underlying cause** | **RMR (95% CI)**  **Any mention cause** | **SMR (95% CI)**  **Underlying cause** | **RMR (95% CI)**  **Any mention cause** |
| **Cancer (All)** | 1.00 (0.86-1.17) | 1.13 (0.98-1,30) | 0.88 (0.61-1.23) | 1.05 (0.76-1.40) |
| Lung | 1.07 (0.79-1.42) | 1.13 (0.85-1.47) | 1.09 (0.56-1.90) | 1.10 (0.59-1.89) |
| Breast | 1.16 (0.76-1.70) | 1.28 (0.87-1.81) | 2.30 (0.92-4.74) | 2.20 (0.95-4.33) |
| Colorectal | 0.98 (0.55-1.62) | 1.32 (0.83-2.00) | 0.82 (0.17-2.39) | 0.95 (0.26-2.44) |
| Pancreatic | 1.27 (0.66-2.23) | 1.23 (0.64-2.15) | 0.45 (0.01-2.52) | 0.87 (0.10-3.13) |
| Lymphoid/ hematopoietic | 0.76 (0.37-1.40) | 1.16 (0.69-1.84) | 0.30 (0.01-1.68) | 1.49 (0.55-3.25) |
| Bladder | **2.67 (1.08-5.51)** | 2.15 (0.87-4.44**)** | 1.18 (0.03-6.55) | 0.88 (0.02-4.88) |
| Prostate | 1.25 (0.34-3.21) | 1.61 (0.65-3.32) | 1.13 (0.14-4.09) | 1.60 (0.44-4.09) |
| Brain | 1.63 (0.74-3.09) | 1.73 (0.83-3.17) | 0.00 (0.00-3.76) | 0.00 (0.00-3.55) |
| **Cardiovascular diseases** | **1.56 (1.31-1.83)** | **1.68 (1.48-1.90)** | **1.61 (1.20-2.11)** | **1.83 (1.47-2.25)** |
| **Respiratory diseases /infections** | **2.51 (1.94-3.19)** | **4.66 (4.25-5.11)** | **3.17 (2.11-4.58)** | **4.49 (3.76-5.32)** |
| **Other Infections** | **1.97 (1.20-3.04)** | **3.20 (2.62-3.89)** | 1.12 (0.14-4.06) | **4.32 (2.87-6.25)** |
| **Endocrine/nutritional diseases** | 0.54 (0.23-1.07) | **1.64 (1.32-2.02)** | 1.48 (0.54-3.22) | **2.14 (1.47-3.00)** |
| **Digestive System** | 1.11 (0.70-1.69) | **1.35 (1.05-1.72)** | 0.90 (0.25-2.31) | 1.35 (0.76-2.23) |
| **Genitourinary disorders/infections** | **2.46 (1.27-4.30)** | **3.38 (2.82-4.03)** | **6.97 (3.48-12.47)** | **4.91 (3.67-6.44)** |
| **Suicide** | **2.52 (1.66-3.66)** | **2.51 (1.66-3.66)** | 1.55 (0.19-5.61) | 1.56 (0.19-5.60) |
| **Accident** | 0.90 (0.57-1.37) | **2.78 (2.23-3.42)** | 0.86 (0.18-2.51) | **2.45 (1.34-4.10)** |

SMR: Standardized Mortality Ratio; RMR: Relative Mortality Ratio; CI: Confidence Interval. Risk estimates with CIs that do not include one are bolded.
